# Supplementary material
Source: Springer Nature journal article supplement (https://www.springermedizin.de/resource/supplementary/12879_2012_2002_MOESM8_ESM.pdf/9443448)

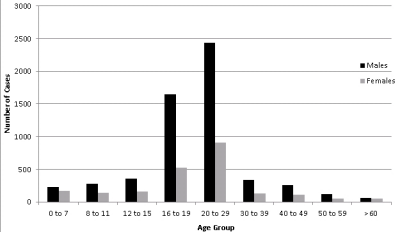

Supplement: MOESM8 [file 9443448]
